1 **Investigating Coronary Artery Disease methylome through targeted bisulfite sequencing**

2

3 Subhoshree Ghose<sup>1,2</sup>, Sourav Ghosh<sup>1,2</sup>, Vinay Singh Tanwar<sup>1,2</sup>, Priya Tolani<sup>1</sup>, Anju Sharma<sup>1</sup>, Nitin  
4 Bhardwaj<sup>1</sup>, Shamsudheen KV<sup>1,2</sup>, Ankit Verma<sup>1</sup>, Rijith Jayarajan<sup>1</sup>, Sridhar Sivasubbu<sup>1,2</sup>, Vinod  
5 Scaria<sup>1,2</sup>, Sandeep Seth<sup>3</sup>, Shantanu Sengupta<sup>1,2\*</sup>

6

7 <sup>1</sup> CSIR-Institute of Genomics and Integrative Biology, Mathura Road, New Delhi-110025, India

8 <sup>2</sup> Academy of Scientific and Innovative Research (AcSIR), Ghaziabad-201002, India

9 <sup>3</sup> Department of Cardiology, All India Institute of Medical Sciences, New Delhi

10

11

12

13

14

15

16

17

Address for correspondence:

18

19

**Shantanu Sengupta**

20

21

Cardio-respiratory Disease Unit

22

Room No. 201, CSIR-Institute of Genomics and Integrative Biology,

23

Sukhdev Vihar, Mathura Road

24

New Delhi - 110 020

25

Tel: 91-11-29879 201

26

Fax: 91-11-27667 471

27

Email: [shantanus@igib.res.in](mailto:shantanus@igib.res.in)

28

29

30

31

32

33

34

35

36

37

Abbreviations:

38

39 TG: Triglyceride; LDL-C: Low density lipoprotein cholesterol; HDL-C: High density lipoprotein cholesterol; CAD:

40

Coronary Artery Disease; LDLR: Low density lipoprotein receptor; HMGCR: 3-Hydroxy-3-Methylglutaryl-CoA

41

Reductase; APOA1: Apolipoprotein A1; APOA4: Apolipoprotein A4; APOA5: Apolipoprotein A5; GWAS:

42

Genome wide association study; EWAS: Epigenome wide association study

43  
44  
45  
46  
47  
48  
49  
50  
51  
52  
53  
54  
55  
56  
57  
58  
59  
60  
61  
62  
63  
64  
65  
66  
67  
68  
69  
70  
71  
72  
73  
74

**Abstract:**

**Background:** Gene environment interactions leading to epigenetic alterations play pivotal role in the pathogenesis of Coronary Artery Disease (CAD). Altered DNA methylation is one such epigenetic factor that could lead to altered disease etiology. In this study, we comprehensively identified methylation sites in several genes that have been previously associated with young CAD patients.

**Methods:** The study population consisted of 42 healthy controls and 33 young CAD patients (age group < 50 years). We performed targeted bisulfite sequencing of promoter as well as genic regions of several genes in various pathways like cholesterol synthesis and metabolism, endothelial dysfunction, apoptosis, which are implicated in the development of CAD.

**Results:** We observed that the genes like *GALNT2*, *HMGCR* were hypermethylated in the promoter whereas *LDLR* gene promoter was hypomethylated indicating that intracellular LDL uptake was higher in CAD patients. Although *APOA1* did not show significant change in methylation but *APOC3* and *APOA5* showed variation in methylation in promoter and exonic regions. Glucokinase (*GCK*) and endothelial nitric oxide synthase 3 (*NOS3*) were hypermethylated in the promoter. Genes involved in apoptosis (*BAX/BCL2/AKT2*) and inflammation (*PHACTR1/LCK*) also showed differential methylation between controls and CAD patients.

**Conclusions:** This study is unique because it highlights important gene methylation alterations which might predict the risk of young CAD in Indian population. Large scale studies in different populations would be important for validating our findings and understanding the epigenetic events associated with CAD.

*Keywords: Coronary Artery Disease; DNA methylation; Cholesterol metabolism; Apolipoproteins; Cholesterol; Triglycerides; LDL-C; HDL-C; Promoter; Exon*

75

76 **Introduction:**

77

78 Coronary Artery Disease (CAD), a complex multifactorial disease thought to occur via complex  
79 amalgamation between genetic and environmental factors, is manifested via dyslipidemia, obesity,  
80 raised blood pressure, aortic constrictions and eventual myocardial infarction. According to a  
81 WHO report, it was estimated that between 2000–2012, deaths due to CAD were about 56 million  
82 worldwide (Pagidipati and Gaziano 2013). This statistic is expected to alarmingly increase due to  
83 sedentary lifestyle and poor nutrition status in developing countries. The burden of CAD is huge  
84 worldwide and is identified to be one of the top five causes of death (Gupta, Gupta et al. 2012).  
85 A number of modifiable (smoking, diabetes, physical inactivity, hypertriglyceridemia,  
86 hypertension, obesity) and non-modifiable risk factors (age, gender, family history) have been  
87 attributed to disease pathophysiology (Huma, Tariq et al. 2012). Over the years, genome wide  
88 association (GWAS) studies on several populations have identified a significant number of single  
89 nucleotide polymorphisms (SNPs) located in genes and their vicinity which might play a role in  
90 disease progression. However, these SNPs account only for 10-15% of the disease risk  
91 (Consortium 2011; Deloukas, Kanoni et al. 2013) (Yamada, Yasukochi et al. 2018). The largest  
92 CAD GWAS study (CARDIoGRAMplusC4D) revealed approximately 46 susceptibility loci and  
93 104 suggestive loci to be significantly associated with the disease (Deloukas, Kanoni et al. 2013)  
94 In a recent study, variants in the genes involved in actin remodeling are reported to be associated  
95 with LDL-C levels and CAD (Siewert and Voight 2018). Additionally, common variants in the  
96 CDKN2B-AS1 region have been reported to influence lipid metabolism and might be associated  
97 with CAD in Turkish population (Temel and Ergoren 2019). Exome wide association studies  
98 (EWAS) conducted on Japanese population identified 21 genes and 5 new chromosomal regions  
99 which were individual determinants of susceptibility towards early onset of CAD (Yamada,  
100 Yasukochi et al. 2018). Although a handful of studies have highlighted the importance of genetic  
101 variants in influencing lipid parameter but their underlying role in disease manifestation has not  
102 been elucidated well.

103 For complex diseases like CAD, both genetic and environmental factors contribute to the disease  
104 etiology where gene-environment interactions are thought to play a major role. Thus, it is not  
105 surprising that attempts have been made towards identifying epigenetic modulators especially

106 DNA methylation in the context of CAD. DNA methylation is a stable modification which  
107 involves the addition of a methyl group to the fifth carbon position of cytosine base in CpG  
108 dinucleotides of the mammalian genome by DNA methyltransferases (DNMTs) and known to  
109 regulate gene expression (Vaissiere and Miller 2011). Several risk factors of CAD for example  
110 tobacco smoking has been reported to alter DNA methylation status of a few candidate genes  
111 involved in atherosclerosis (Steenard, Ligthart et al. 2015). Moreover, epigenome wide  
112 association studies performed in different populations highlight the importance of methylation  
113 regulation in cardiovascular disease development (Nakatohi, Ichihara et al. 2017; Yamada,  
114 Horibe et al. 2018). A recent study performed on Chinese population affected with Acute Coronary  
115 Syndrome (ACS) highlighted some DNA methylation based markers relevant to several pathways  
116 like chemotaxis, apoptosis, thrombosis and atherogenic signaling (Li, Zhu et al. 2017).  
117 Interestingly, in French Canadian founder population, it was reported that DNA hypomethylation  
118 in the promoter region of TNNT1 gene was directly associated with dyslipidemia and the risk for  
119 CAD (Guay, Legare et al. 2016). Moreover, leukocyte LINE-1 methylation, a surrogate for global  
120 DNA methylation has been identified as a predictor of myocardial infarction and cardiovascular  
121 risk in men of Samoan islander population (Cash, McGarvey et al. 2011).

122 We have earlier shown that global DNA methylation was much higher in CAD patients in India  
123 which was also associated with hyperhomocystenemia, an independent risk factor for CAD  
124 (Sharma, Kumar et al. 2008; Sharma, Garg et al. 2014). Hyperhomocysteinemia is prevalent in  
125 India due to wide spread deficiency of vitamin B<sub>12</sub>, presumably due to adherence to strict  
126 vegetarian diet. We also showed low vitamin B<sub>12</sub> levels were associated with CAD in Indian  
127 population (Kumar, Garg et al. 2009; Basak, Tanwar et al. 2016).

128 Epidemiological reports have documented high incidences of CAD in India which has grown  
129 enormously in the past 60 years (Gupta, Mohan et al. 2016). It is anticipated that by 2030, almost  
130 60% of deaths due to CAD will be in India. Notably, CAD occurs at least a decade earlier in  
131 Indians than western countries. This was also confirmed in a recent report by *Chaudhary et al*  
132 where it was shown that CAD manifests at an early age (< 40 years) in India. One of the reasons  
133 for this would be differences in methylation profile due to unique dietary habits in Indian  
134 population. However, to the best of our knowledge there are no comprehensive study in Indian  
135 population where alteration of DNA methylation has been looked at specifically in young CAD  
136 patients.

137 Therefore, in the current study, we analyzed the DNA methylation status of several genes that have  
138 been implicated in CAD in young individuals (25-50 years) to understand the role of DNA  
139 methylation in developing premature CAD.

140

141

## 142 **Material and Methods:**

143

### 144 **Study population and biochemical parameter measurement:**

145 We performed a cross sectional study to examine the DNA methylation status of promoter and  
146 gene body region of several genes associated with CAD in 42 healthy controls and 33 young CAD  
147 subjects. CAD patients were recruited from All India Institute of Medical Sciences (AIIMS), New  
148 Delhi following coronary angiography and the healthy controls were from the general population.  
149 The study was undertaken in accordance with the Principles of the Helsinki Declaration and was  
150 approved by the ethical committee of both CSIR-IGIB & AIIMS, New Delhi. All the participants  
151 were males between the age group (25-50) years. Participants taking anti-hypertensive or anti  
152 diabetic medications were excluded from the study. These healthy individuals were neither having  
153 any family history of cardiovascular disease nor reported of any chest pain or obstruction. For the  
154 current study, control and CAD patient samples were randomly screened from a group of samples  
155 previously collected from National Capital Region (NCR) for a separate study (Sharma, Garg et  
156 al. 2014; Basak, Tanwar et al. 2016). Blood samples were collected from all these individuals and  
157 were centrifuged at 1200 rpm for 20 minutes at 4°C. High quality genomic DNA was isolated from  
158 blood samples using the modified salting out method (Sharma, Garg et al. 2014) from all the 75  
159 subjects and their concentration was estimated using fluorometric quantitation method using Qubit  
160 ds DNA BR kit. (Qubit fluorometer 2.0, Invitrogen).

161

162

163

164

### 165 **DNA methylation analysis:**

#### 166 **Methylation probe design:**

167

168 We reviewed literature from the year 2003-2013, and retrieved information about the genes which  
169 were reported to be associated with CAD in different populations. A total of 48 genes were chosen  
170 through literature mining and their promoter and gene body region were selected for biotinylated  
171 probe design using Sure Design advanced online tool  
172 (<https://earray.chem.agilent.com/suredesign>). Some of the genes were already reported to have  
173 altered methylation in CAD patients in other populations. Mutations or polymorphism in some of  
174 these genes have also been reported with CAD earlier. The list of genes is provided in  
175 Supplementary Table 1. Repetitive regions were also included in the design for genes like  
176 *CDKN2BAS*, *CDKN2B-AS1*, *LDLR* and *APOA1* cluster. The overall probe size was 497.225 kbp  
177 corresponding to a total of 8461 probes.

178

### 179 **Sample preparation and targeted bisulfite sequencing:**

180

181 About 3 µg of good quality genomic DNA in 50 µl was fragmented using Covaris (S series S220)  
182 to an estimated size of 100-150 bp. Fragmentation size was determined using DNA 1000 Kit  
183 (Agilent p/n 5067-1504) according to manufacturer's instructions. Fragmented DNA was then end  
184 repaired using end repair mix followed by AMPure bead based purification. End repaired libraries  
185 had an average size of 125-175 bp. Further, end repaired libraries were subjected to dA tailing  
186 where a single adenine base "A" was added to the 3' end of the library and another round of  
187 AMPure bead based purification was performed. Methylated adapter ligation was performed on  
188 the dA tailed DNA using ligation master mix provided in the kit. Purification after this step was  
189 done immediately to avoid self-ligation of adapters. The quality of the end repaired and adapter  
190 ligated libraries were checked using DNA 1000 kit in Bioanalyzer (Supplementary Fig 3).  
191 Following methylated adapter ligation, the size increased to 200-300 bp as expected  
192 (Supplementary Fig 3). The adapter ligated libraries were then subjected to hybridization with the  
193 custom designed RNA bait library (Agilent Technologies) at 65°C for 24 hours followed by capture  
194 using streptavidin coated magnetic beads. Hybridized libraries were purified using magnetic bead  
195 based purification method. Finally, captured DNA was modified using EZ Gold DNA methylation  
196 kit (Zymo research, CA, USA.) After bisulfite conversion, desulfonation was performed and  
197 captured bisulfite converted DNA was eluted in nuclease free water. In the final step, all the 75  
198 bisulfite converted libraries were indexed using 75 unique 8 bp Sure Select XT indexes (A01-

199 H012 provided in Agilent Sure Select Methyl Seq Target Enrichment Kit) and PCR amplified for  
200 8 cycles according to the following conditions: 95°C for 2 mins for initial denaturation; 95°C for  
201 30 sec, 60°C for 30 sec, 72°C for 30 sec for amplification; 72°C for 7 min; 4°C hold. The quality of  
202 the libraries were then checked in Bioanalyzer using Agilent ds DNA High Sensitivity Kit  
203 following manufacturer's guidelines. Size of the final libraries were between 200-300 bp with  
204 unique single indexes (Supplementary fig 3). The indexed libraries were quantified using Qubit  
205 High sensitivity DNA kit (Qubit HS). All the indexed libraries were then diluted to 5 nM  
206 concentration and combined into a single pool which was used for sequencing.

207

### 208 **Sequencing and downstream analysis:**

209

210 All the 75 libraries were diluted to 5 nM concentration and the indexed libraries were mixed into  
211 a pool. The pool was diluted to 15 pM and loaded onto the flow cell. Sequencing was performed  
212 in paired end mode (150x2) and run for 150 cycles in HiSeq 2500 (Illumina, CA. USA). Raw  
213 targeted bisulfite sequencing reads were initially checked for QC and then filtered through FastQC  
214 and low quality reads were removed. Adapter trimming was done by Trimmomatic pipeline to  
215 remove adapter contaminations and low quality reads. High quality paired end reads were then  
216 aligned against human genome (hg19 genome assembly downloaded from UCSC) using Bismark  
217 tool from Babraham bioinformatics. Alignment percentage was calculated considering both  
218 uniquely and multiple aligned reads. Further read coverage was calculated using the formula:  
219  $(\text{Total reads} * \text{read length}) / \text{targeted capture region}$ . The 'SAM' files generated after alignment, were  
220 then used as input for methylation extractor component in Bismark tool, which generated genome  
221 wide cytosine reports. The cytosine report file gave methylation status of each cytosine in three  
222 different sequence context, i.e. CpG, CHG and CHH context where 'H' is either of the bases A, T,  
223 or C. For further downstream analysis only the CpG methylation was considered from both the  
224 strands for all the genes included in the study. A total of 311979 unique C & G coordinates in 139  
225 regions, were subjected to downstream analysis  
226 of which 104690 sites were obtained after selecting the read coverage and methylation percentage  
227 cut-off (read coverage  $\geq 5$  and methylation percentage  $\geq 20\%$ ) (Supplementary fig 2). Out of these,  
228 about 6400 coordinates were reported in at least 2 samples (Supplementary Table 3). Unpaired  
229 Student's t-test was performed on these coordinates to identify the differentially methylated CpG



230 sites ( $p < 0.05$ ). We found 260 such CpG sites, associated with 45 genes to be significantly (p-  
231 value  $< 0.05$ ) differentially methylated between controls and CAD patients (Supplementary Table  
232 4). Further those CpG sites harboring significant differential methylation were mapped back to  
233 their respective genomic locations using in-house PERL programme.

234

### 235 **Results:**

236

237 The demographic characteristics of the individuals included in the study are provided in Table 1.  
238 The average age of controls and cases were 40.7 and 42.1 years respectively indicating that  
239 relatively young individuals were considered for this study.

240 Targeted bisulfite sequencing of 48 genes (details provided in Supplementary Table 1) were  
241 performed in 42 control and 33 Coronary Artery Disease (CAD) patients. The raw sequencing  
242 reads were mapped to the reference human genome (hg19) with a median mapping efficiency of  
243 approximately 60% in both cases and controls, with more than 30X read coverage (Figure. 1). The  
244 raw sequencing read count, alignment percentage and read coverage for all the 75 individuals  
245 recruited in the study are shown in Supplementary Table 2.

246

### 247 **Impairment of cholesterol biosynthesis and metabolism in CAD patients:**

248 One of the mechanisms proposed for the manifestation of CAD is accumulation of intracellular  
249 cholesterol, which could be due to increased synthesis or intracellular import of cholesterol or  
250 reduced intracellular cholesterol efflux. The rate limiting step of cholesterol biosynthesis is  
251 catalyzed by the enzyme 3-Hydroxy-3-Methylglutaryl-CoA-reductase (*HMGCR*) which exhibited  
252 hypermethylation in the promoter region. (Figure 2A) indicating less cholesterol synthesis. This is  
253 in agreement with a previous study by Peng et. al. (2014) where they also reported  
254 hypermethylation of *HMGCR* promoter region (Peng, Wang et al. 2014). However, we also  
255 observed that 24 CpG sites falling in the *LDLR* gene to be significantly differentially methylated  
256 in CAD patients. The promoter region of *LDLR* was hypomethylated (average methylation of 87%  
257 in controls and 84% in cases,  $p < 0.05$ ), while the exonic regions were hypermethylated (Figure  
258 2B) in CAD patients (average methylation of 97% in cases and 94% in controls,  $p < 0.05$ ),



259 suggesting increased expression of LDLR. These results indicate lower synthesis of cholesterol  
260 but higher intracellular cholesterol uptake in CAD patients.

261 On the other hand, although there was no significant difference in methylation of the promoter or  
262 exonic regions of *APOA1*, an important mediator of cholesterol efflux, we found hypermethylation  
263 in the promoter of *GALNT2* (Figure 2C) gene indicating lower expression. A loss of function of  
264 *GALNT2* (Khetarpal, Schjoldager et al. 2016) gene has been reported to reduce the activity of  
265 phospholipid transfer protein (PLTP) thereby affecting the cholesterol efflux pathway leading to  
266 low HDL levels. We indeed found significantly low HDL levels in CAD patients (29.2 mg/dl) as  
267 compared to controls (43.5 mg/dl). Besides, one of the targets of *GALNT2* is *APOC3*. Interestingly,  
268 the exons of *APOC3* were hypomethylated and 2 of the 3 differentially methylated CpGs in the  
269 promoter region were hypermethylated (Figure 2D) suggesting low levels of ApoC3 in CAD  
270 patients. Low ApoC3 levels have been reported to be associated with low triglyceride levels which  
271 we have also observed in the plasma of CAD patients (Crosby, Peloso et al. 2014). We further  
272 observed that promoter of *APOA5* was hypomethylated and exons were hypermethylated which  
273 could result in low triglyceride levels in CAD patients (Figure 2E). Consistent with this the levels  
274 of triglyceride in the CAD patients were lower (96.9 mg/dl) than controls (142.9 mg/dl).

275

### 276 **Hyperglycemia leading to endothelial dysfunction and inflammation:**

277

278 Elevated blood glucose levels have been an important risk factor for CAD. We found that the  
279 promoter region of the gene *GCK* (glucokinase), which plays a major role in converting glucose to  
280 glucose 6 phosphate, is hypermethylated (Figure 3A) which could be responsible for lowered  
281 expression of *GCK* and increased blood glucose levels in CAD patients (110 mg/dl) as compared  
282 to controls (96 mg/dl) found in this study. Interestingly, the gene activating transcription factor 3  
283 (*ATF3*) which is known to transcriptionally suppress the expression of glucokinase (*GCK*) was  
284 observed to be hypomethylated in the 5'UTR region (cg212739706) and hypermethylated in the  
285 exon (cg212793952) which could lead to increased ATF expression and low *GCK* levels. (Figure  
286 3B).

287 It is known that endothelial cells exposed to hyperglycemic conditions show decreased NO  
288 production, increased levels of adhesion molecules accompanied by inflammation and also

289 increased levels of apoptosis (Funk, Yurdagul et al. 2012). This is also suggestive from our results  
290 as we found hypermethylation in the promoter of endothelial nitric oxide synthase (*eNOS*) gene  
291 responsible for NO production in the endothelial cells (Figure 3C) which could potentially lead to  
292 reduced levels of NO and vasoconstriction in the arteries. We also observed hypomethylation in  
293 the 5' UTR region of cell adhesion molecule *ICAM2* (cg62086376) implying increased adhesion  
294 and aggregation processes occurring during atherosclerosis (Figure 3D).

295 It is also known that endothelial dysfunction is responsible for inducing cell apoptosis via  
296 inhibition of NO (van den Oever, Raterman et al. 2010) and increased apoptosis was found in CAD  
297 patients (Kaplan and Demircan 2018). This leads us to assess the level of methylation in the genes  
298 responsible for causing apoptosis in CAD patients. The pro-apoptotic gene *BAX* promoter  
299 (cg49453159) was hypomethylated (Figure A) whereas anti-apoptotic *BCL2* gene promoter  
300 (cg60995889) was hypermethylated in CAD patients (Figure 4B). Interestingly, we observed  
301 altered methylation in the *LCK* (Src family of tyrosine kinase) gene, where 5' UTR region was  
302 hypomethylated (cg32739493) and exonic region (cg32740607) was hypermethylated (Figure 4C)  
303 indicating possible upregulation of the *LCK* gene. Upregulation of LCK is indicative of activated  
304 T cell signaling which also leads to activation of pro inflammatory molecule NF-K $\beta$ . Increased  
305 expression of LCK is associated with mitochondrial apoptosis (Samraj, Stroh et al. 2006). Besides  
306 *AKT2*, a phosphoinositide dependent serine threonine kinase showed hypomethylation in the  
307 promoter region (cg40795616, cg40794901) suggesting positive regulation of pro inflammatory  
308 factor NF- K $\beta$  (Figure 4D).

309

310 **Genes involved in extracellular matrix remodeling and platelet aggregation were**  
311 **differentially methylated in CAD:**

312

313 We found that phosphatase and actin regulator 1 (*PHACTR1*) gene harbored hypermethylation in  
314 the promoter (cg12711037, cg12715861) and hypomethylation in the exon (cg12717069) (Figure  
315 5A) suggestive of lower expression of PHACTR1. Down regulation of *PHACTR1* has been  
316 reported to increase expression of matrix-metalloproteinase regulators and pro inflammatory  
317 factors (Jarray, Pavoni et al. 2015). Matrix metalloproteinase regulators were altered in acute  
318 coronary patients (Liu, Sun et al. 2006) and in this study we observed tissue inhibitor of matrix

319 metalloproteinase 3 (*TIMP3*) to be hypomethylated in the promoter indicating increased  
320 expression (Figure 5B).

321 We probed into the methylation status of the genes causing extracellular matrix turnover of the  
322 endothelial wall and intimal angiogenesis. The gene *P2RY12* responsible for platelet activation  
323 which encodes for purinergic receptor exhibited hypomethylation in the promoter region (Figure  
324 5C) which could be responsible for platelet aggregation and inflammatory processes associated  
325 with atherosclerosis. Interestingly, we observed that the four loci falling into the promoter region  
326 of *CTGF* (Connective tissue growth factor) was hypomethylated which could lead to their  
327 increased expression and eventually lead to increased angiogenesis (Figure 5D). Promoter of  
328 *PLA2G7* (Phospholipase 2G7) known to catalyze degradation of platelet activating factor and  
329 abundant in necrotic core of coronary lesions, was found to be hypermethylated indicating lowered  
330 expression (Figure 5E).

331

### 332 **Methylation status of CDKN2B-AS1 (ANRIL) loci in CAD:**

333

334 Genome wide association and candidate gene studies have identified that polymorphisms in the  
335 gene *CDKN2BAS* (cyclin-dependent kinase inhibitor 2B antisense RNA) is linked to the  
336 predisposition towards the risk of coronary artery disease (CAD) (Samani, Erdmann et al. 2007).  
337 It is also reported that *CDKN2BAS* encodes a noncoding RNA (ANRIL) which plays a key role  
338 in progression of atherogenesis by modulating pathways like vascular cell proliferation,  
339 thrombogenesis and plaque stability (Zhao, Liao et al. 2016). We wanted to investigate the  
340 presence of DNA methylation in the regulatory region of cyclin dependent kinase inhibitor 2B anti  
341 sense RNA (*CDKN2BAS1*), polymorphisms of which have been reported with CAD in Han  
342 Chinese population. We observed that 5 out of 9 CpG sites falling in the promoter were  
343 hypermethylated. Overall promoter percentage methylation in CAD patients were 48.5 whereas in  
344 controls it was 47.3 (Figure 6).

345

346

347

348

349 **Discussion:**

350  
351 In the current study, we interrogated DNA methylation status of candidate genes involved in  
352 cholesterol biosynthesis and metabolism, endothelial dysfunction, inflammation and apoptosis in  
353 relevance to the pathophysiology in young CAD patients. The genes chosen for the current study  
354 were previously reported to be associated with CAD in other populations. Polymorphisms of some  
355 of these genes were found to be associated with CAD earlier. Since cholesterol synthesis and  
356 metabolism is arguably one of the most important processes involved in the manifestation of CAD,  
357 we checked the methylation of a few genes involved in these processes. We observed that  
358 cholesterol biosynthetic gene *HMGCR* was hypermethylated in the promoter indicating lower  
359 expression. *Peng et al.* reported that *HMGCR* showed hypermethylation in the promoter (Peng,  
360 Wang et al. 2014). Lower expression of *HMGCR* could hint at lower cholesterol synthesis.  
361 Interestingly, we found promoter hypomethylation and exonic hypermethylation in the *LDLR* gene  
362 indicating higher uptake of lipoproteins inside the cell. It is very well established that promoter  
363 hypermethylation is associated with loss of transcription (Lim and Maher 2010). We and others  
364 have earlier shown that CAD in Indian population is usually associated with low HDL levels  
365 (Gupta, Rao et al. 2017). Excess intracellular cholesterol and other lipids are exported out of the  
366 cells in the form of HDL. Although, ApoA1, which initiates this process of reverse cholesterol  
367 transport did not show any significant alteration in methylation, *GALNT2*, which codes for  
368 polypeptide Gal-N-Ac transferase 2, was found to be hypermethylated in the promoter region.  
369 *GALNT2* is known to influence O linked oligosaccharide biosynthesis thus modulating HDL-C  
370 levels in blood. Interestingly, a recent study by *Sumeet A. Khetarpal et. al.* identified a novel  
371 mechanism of regulation of HDL-C metabolism by reducing O-sialylation of APOC3 residues and  
372 subsequent reduction of phospholipase transfer protein (PLTP) activity in primates (Khetarpal,  
373 Schjoldager et al. 2016). Therefore it could be hypothesized that increased promoter methylation  
374 in the *GALNT2* gene could be causing reduced glycosylation of *APOC3* and hence reduce HDL-C  
375 levels in blood predisposing the individuals towards CAD. Besides, *GALNT2* gene has also been  
376 shown to harbor promoter hypermethylation in CAD patients of Chinese population. We also  
377 found that *APOC3* and *APOA5* showed differential methylation in promoter and exonic region,  
378 with *APOC3* showing hyper while *APOA5* hypomethylation in the promoter region and vice versa  
379 in the exonic region. This suggests that CAD patients could have low APOC3 and high APOA5  
380 levels resulting in low triglyceride levels. This is surprising because high triglyceride levels have

381 long known to be a classical risk factor of CAD (Gotto 1998). Evidences also suggest that  
382 increased expression of *APOA5* could cause indirect activation of lipoprotein lipases (LPL) present  
383 on the surface of macrophages, endothelial cells and smooth muscle cells which might lead to  
384 accumulation of cholesterol esters inside macrophages via inhibition of cholesterol efflux  
385 (Ostlund-Lindqvist, Gustafson et al. 1983). This paradox of lower plasma cholesterol and  
386 triglyceride levels in Indian patients could probably be due to low vitamin B<sub>12</sub> levels. We had  
387 earlier shown that low vitamin B<sub>12</sub> is associated with CAD in Indian population. In this study also  
388 the levels of vitamin B<sub>12</sub> were lower in CAD cases than controls (Kumar, Garg et al. 2009). Vitamin  
389 B<sub>12</sub> deficiency has been linked to increased expression of LDLR in hepatocytes  
390 (Adaikalakoteswari, Finer et al. 2015). Vitamin B<sub>12</sub> levels have also been found to directly  
391 correlate with HDL levels. Taken together, we hypothesize that vitamin B<sub>12</sub> deficiency leads to  
392 increased cellular influx and decreased efflux of cholesterol. Notably, observations from the  
393 landmark INTERHEART study highlighted that South Asians had low triglyceride and LDL-C  
394 levels as compared to non-Asians and in acute MI patients triglyceride levels were lower as  
395 compared to controls (Karthikeyan, Teo et al. 2009).

396 Raised blood glucose levels are a known risk factor for CAD and we found hypermethylation in  
397 the promoter of *GCK* gene in CAD patients. *GCK* converts glucose to glucose-6-phosphate and  
398 the gene promoter (-287 to -158) is known to have a putative binding site for activating  
399 transcription factor 3 (ATF3) which ultimately leads to GCK down regulation in pancreatic  $\beta$   
400 cells (Kim, Hwang et al. 2014). 5'UTR hypomethylation in the *ATF* gene suggests that under  
401 atherosclerotic conditions, increased expression of ATF3 may potentially mediate its binding to  
402 the GCK promoter and hence down regulate its transcription. It is also known that hyperglycemia  
403 can augment cardiovascular risk through several signaling pathways, i.e. downregulation of NO  
404 production via eNOS phosphorylation, *de novo* synthesis of diacylglycerol (DAG) and  
405 upregulation of NF- $\kappa$ B activity (Funk, Yurdagul et al. 2012). Clinical evidences suggest that  
406 hyperglycemia induced endothelial dysfunction is involved in the pathogenesis of atherosclerosis  
407 (van den Oever, Raterman et al. 2010). Inflammation has been known to play pivotal role in  
408 facilitating atherosclerotic risk independent of serum cholesterol levels (Fioranelli, Bottaccioli et  
409 al. 2018). *AKT2* gene, a phosphoinositide dependent serine threonine kinase has been known to  
410 induce polarization of macrophages towards M1 state and promote atherosclerosis risk. It is also  
411 known that *AKT2* gene in macrophages plays an important role in migration of monocytes and

412 stimulating pro inflammatory response (Rotllan, Chamorro-Jorganes et al. 2015). Besides,  
413 activation of *LCK* gene is an indication towards pro-inflammatory state in endothelial cells. We  
414 identified promoter hyper methylation in *PHACTR1* gene indicating that expression of this gene  
415 could be low in CAD patients. Knockdown of *PHACTR1* gene has been earlier reported to cause  
416 impaired vascular development in zebrafish (Jarray, Pavoni et al. 2015). Moreover, knockdown of  
417 *PHACTR1* has been linked to reduced activity of pro inflammatory cytokine NF- $\kappa$ B (Zhang, Jiang  
418 et al. 2018).

419 Collagen deposition and extracellular matrix remodeling in the vessel wall is an integrative  
420 component of atherosclerosis. We found promoter hypomethylation in the *CTGF* gene indicating  
421 higher expression of CTGF which could also be triggered by pro inflammatory molecules and lead  
422 to endothelial apoptosis. Pro and anti-apoptotic genes also showed differential methylation in the  
423 promoter. We also checked the methylation status of genes involved in platelet aggregation and  
424 angiogenesis. The gene phospholipase A2 (*PLA2G7*) has been reported to be positively correlated  
425 to atherosclerotic risk in human studies but in our data but we observed promoter hypermethylation  
426 indicating low expression of this gene. However, hyper methylation in the promoter of (*PLA2G7*)  
427 gene has previously been reported to be associated with the risk of coronary heart disease (CHD)  
428 (Jiang, Zheng et al. 2013).\_Finally, we investigated methylation levels in the “Chr9p21” region  
429 which is known to be associated with coronary artery calcification and atherosclerosis. A recent  
430 study by *Shuyu Zhou et. al.* has reported higher methylation in the cyclin dependent kinase  
431 inhibitor 2B (*CDKN2B*) gene in peripheral blood of ischemic stroke patients. (Zhou, Zhang et al.  
432 2016).\_We have observed an opposing trend of methylation in the *CDKN2BAS1* (cyclin dependent  
433 kinase inhibitor 2B anti sense1) promoter region. Additionally, *CDKN2B* exonic regions were  
434 identified to have significantly increased levels of methylation which is linked to vascular smooth  
435 muscle cell proliferation. Our data has provided evidences that DNA methylation has an important  
436 role to play in the pathogenesis of CAD which has long term clinical relevance as well. Although  
437 our study highlights important methylation alterations in young CAD but they suffer from a few  
438 limitations. We did not look at gender specific differences and cell type specific variations of  
439 methylation.

440

441

442 **Conclusions:**



443 In this study, we observed that in CAD patients *HMGCR* and *GALNT2* genes were  
444 hypermethylated in the promoter indicating that cholesterol biosynthesis might be low. Besides,  
445 LDLR receptor showed promoter hypomethylation and exonic hypermethylation indicating that  
446 intracellular cholesterol uptake might be higher resulting in low plasma LDL-C levels. Low  
447 APOC3 and higher APOA5 levels also reinforce our presumptions. Genes involved in endothelial  
448 dysfunction and inflammation showed differential methylation in CAD patients. Endothelial *NOS3*  
449 gene showed hypermethylation in promoter. These observations point towards the fact that genes  
450 involved in processes like cholesterol metabolism, hyperglycemia induced endothelial  
451 dysfunction, inflammation, extracellular matrix remodeling and platelet aggregation harbor  
452 significant methylation signatures that need further validation in large prospective cohorts. This  
453 study is also unique since it has investigated several genes whose methylation status has not been  
454 investigated earlier in CAD patients of any other population. This study also highlights the  
455 importance of methylation in the *CDKN2A/CDKN2B* cluster whose methylation status has not  
456 been very well established. It also forms the basis for further investigation into the functional role  
457 of these altered methylated genes in relation to CAD pathogenesis. Our study has investigated  
458 genes linked to important pathological processes involved with CAD majorly cholesterol  
459 homeostasis, endothelial dysfunction, vasoconstriction, endothelial apoptosis and inflammation.  
460 We have also highlighted that DNA methylation at candidate genes belonging to these processes  
461 can be interrogated as epigenetic biomarkers of CAD.

462

463 **Conflict of interest:** The authors report no conflict of interest.

464

465 **Author contributions:** SSG conceptualized the idea and design of the experiment. SG  
466 (Subhoshree) and VST performed the bisulfite experiments. SG (Sourav) & PT (Priya) performed  
467 the bisulfite analysis. Downstream analysis was performed by SG (Subhoshree). Initial manuscript  
468 was drafted by SG (Subhoshree) with critical inputs from SG (Sourav) and SSG. AS (Anju) helped  
469 in performing the experiments and literature survey. SKV, AV, RJ were involved in performing  
470 the sequencing experiments. NB (Nitin) helped in collection of CAD samples from AIIMS and  
471 also performed the biochemical parameter measurements. SSG, SS (Sridhar) and VS provided  
472 critical suggestions to data analysis which helped in improving the manuscript. SS (Sandeep)



473 performed the angiography at AIIMS and supervised the selection of sample cohort in the present  
474 study. We certify that all the authors have read and approved the content of the manuscript.

475

476 **Acknowledgements:** We thank CSIR Network project (BSC0122) for funding. Subhoshree Ghose  
477 & Sourav Ghosh received fellowship support from CSIR. VST, PT, AS, NB, SKV, AV, RJ  
478 received support from CSIR-IGIB. We thank IGIB sequencing facility for the sequencing  
479 experiments. Dr. Sandeep Seth helped with sample collection from AIIMS, New Delhi. The  
480 funding agency had no role in study design or interpretation of results.

481

482

483

484 **References:**

485

486

487

488

489

490

491

492

493

494

495

496 **Adaikalakoteswari, A., S. Finer, et al. (2015). "Vitamin B12 insufficiency induces**  
497 **cholesterol biosynthesis by limiting s-adenosylmethionine and modulating the**  
498 **methylation of SREBF1 and LDLR genes." Clin Epigenetics 7: 14.**

499 **Basak, T., V. S. Tanwar, et al. (2016). "Plasma proteomic analysis of stable coronary artery**  
500 **disease indicates impairment of reverse cholesterol pathway." Sci Rep 6: 28042.**

501 **Cash, H. L., S. T. McGarvey, et al. (2011). "Cardiovascular disease risk factors and DNA**  
502 **methylation at the LINE-1 repeat region in peripheral blood from Samoan Islanders."**  
503 **Epigenetics 6(10): 1257-1264.**

504 **Consortium, I. K. C. (2011). "Large-scale gene-centric analysis identifies novel variants for**  
505 **coronary artery disease." PLoS genetics 7(9): e1002260.**

506 **Crosby, J., G. M. Peloso, et al. (2014). "Loss-of-function mutations in APOC3, triglycerides,**  
507 **and coronary disease." N Engl J Med 371(1): 22-31.**

- 508 Deloukas, P., S. Kanoni, et al. (2013). "Large-scale association analysis identifies new risk  
509 loci for coronary artery disease." Nature genetics 45(1): 25.
- 510 Deloukas, P., S. Kanoni, et al. (2013). "Large-scale association analysis identifies new risk  
511 loci for coronary artery disease." Nat Genet 45(1): 25-33.
- 512 Fioranelli, M., A. G. Bottaccioli, et al. (2018). "Stress and Inflammation in Coronary Artery  
513 Disease: A Review Psychoneuroendocrineimmunology-Based." Front Immunol 9:  
514 2031.
- 515 Funk, S. D., A. Yurdagul, Jr., et al. (2012). "Hyperglycemia and endothelial dysfunction in  
516 atherosclerosis: lessons from type 1 diabetes." Int J Vasc Med 2012: 569654.
- 517 Gotto, A. M., Jr. (1998). "Triglyceride as a risk factor for coronary artery disease." Am J  
518 Cardiol 82(9A): 22Q-25Q.
- 519 Guay, S. P., C. Legare, et al. (2016). "Epigenetic and genetic variations at the TNNT1 gene  
520 locus are associated with HDL-C levels and coronary artery disease." Epigenomics  
521 8(3): 359-371.
- 522 Gupta, R., S. Guptha, et al. (2012). "Regional variations in cardiovascular risk factors in  
523 India: India heart watch." World J Cardiol 4(4): 112-120.
- 524 Gupta, R., I. Mohan, et al. (2016). "Trends in Coronary Heart Disease Epidemiology in  
525 India." Ann Glob Health 82(2): 307-315.
- 526 Gupta, R., R. S. Rao, et al. (2017). "Recent trends in epidemiology of dyslipidemias in  
527 India." Indian Heart J 69(3): 382-392.
- 528 Huma, S., R. Tariq, et al. (2012). "Modifiable and non-modifiable predisposing risk factors  
529 of myocardial infarction-A review." Journal of pharmaceutical sciences and  
530 research 4(1): 1649.
- 531 Jarray, R., S. Pavoni, et al. (2015). "Disruption of phactr-1 pathway triggers pro-  
532 inflammatory and pro-atherogenic factors: New insights in atherosclerosis  
533 development." Biochimie 118: 151-161.
- 534 Jiang, D., D. Zheng, et al. (2013). "Elevated PLA2G7 gene promoter methylation as a  
535 gender-specific marker of aging increases the risk of coronary heart disease in  
536 females." PLoS One 8(3): e59752.
- 537 Kaplan, O. and G. Demircan (2018). "Relationship of Autophagy and Apoptosis with Total  
538 Occlusion of Coronary Arteries." Med Sci Monit 24: 6984-6988.
- 539 Karthikeyan, G., K. K. Teo, et al. (2009). "Lipid profile, plasma apolipoproteins, and risk of  
540 a first myocardial infarction among Asians: an analysis from the INTERHEART  
541 Study." J Am Coll Cardiol 53(3): 244-253.
- 542 Khetarpal, S. A., K. T. Schjoldager, et al. (2016). "Loss of Function of GALNT2 Lowers High-  
543 Density Lipoproteins in Humans, Nonhuman Primates, and Rodents." Cell Metab  
544 24(2): 234-245.
- 545 Kim, J. Y., J. Y. Hwang, et al. (2014). "Chronic ethanol consumption inhibits glucokinase  
546 transcriptional activity by Atf3 and triggers metabolic syndrome in vivo." J Biol  
547 Chem 289(39): 27065-27079.
- 548 Kumar, J., G. Garg, et al. (2009). "Vitamin B12 deficiency is associated with coronary artery  
549 disease in an Indian population." Clin Chem Lab Med 47(3): 334-338.
- 550 Li, J., X. Zhu, et al. (2017). "Genome-Wide Analysis of DNA Methylation and Acute Coronary  
551 Syndrome." Circ Res 120(11): 1754-1767.
- 552 Lim, D. H. and E. R. Maher (2010). "DNA methylation: a form of epigenetic control of gene  
553 expression." The Obstetrician & Gynaecologist 12(1): 37-42.
- 554 Liu, P., M. Sun, et al. (2006). "Matrix metalloproteinases in cardiovascular disease." Can J  
555 Cardiol 22 Suppl B: 25B-30B.
- 556 Nakatochi, M., S. Ichihara, et al. (2017). "Epigenome-wide association of myocardial  
557 infarction with DNA methylation sites at loci related to cardiovascular disease." Clin  
558 Epigenetics 9: 54.

- 559 Ostlund-Lindqvist, A. M., S. Gustafson, et al. (1983). "Uptake and degradation of human  
560 chylomicrons by macrophages in culture. Role of lipoprotein lipase."  
561 Arteriosclerosis 3(5): 433-440.
- 562 Pagidipati, N. J. and T. A. Gaziano (2013). "Estimating deaths from cardiovascular disease:  
563 a review of global methodologies of mortality measurement." Circulation 127(6):  
564 749-756.
- 565 Peng, P., L. Wang, et al. (2014). "A preliminary study of the relationship between promoter  
566 methylation of the ABCG1, GALNT2 and HMGCR genes and coronary heart  
567 disease." PLoS One 9(8): e102265.
- 568 Rotllan, N., A. Chamorro-Jorganes, et al. (2015). "Hematopoietic Akt2 deficiency attenuates  
569 the progression of atherosclerosis." FASEB J 29(2): 597-610.
- 570 Samani, N. J., J. Erdmann, et al. (2007). "Genomewide association analysis of coronary  
571 artery disease." N Engl J Med 357(5): 443-453.
- 572 Samraj, A. K., C. Stroh, et al. (2006). "The tyrosine kinase Lck is a positive regulator of the  
573 mitochondrial apoptosis pathway by controlling Bak expression." Oncogene 25(2):  
574 186-197.
- 575 Sharma, P., G. Garg, et al. (2014). "Genome wide DNA methylation profiling for epigenetic  
576 alteration in coronary artery disease patients." Gene 541(1): 31-40.
- 577 Sharma, P., J. Kumar, et al. (2008). "Detection of altered global DNA methylation in  
578 coronary artery disease patients." DNA Cell Biol 27(7): 357-365.
- 579 Siewert, K. M. and B. F. Voight (2018). "Bivariate Genome-Wide Association Scan Identifies  
580 6 Novel Loci Associated With Lipid Levels and Coronary Artery Disease." Circ  
581 Genom Precis Med 11(12): e002239.
- 582 Steenaard, R. V., S. Ligthart, et al. (2015). "Tobacco smoking is associated with methylation  
583 of genes related to coronary artery disease." Clin Epigenetics 7: 54.
- 584 Temel, S. G. and M. C. Ergoren (2019). "The association between the chromosome 9p21  
585 CDKN2B-AS1 gene variants and the lipid metabolism: A pre-diagnostic biomarker  
586 for coronary artery disease." Anatol J Cardiol 21(1): 31-38.
- 587 Vaissiere, T. and C. A. Miller (2011). "DNA methylation: dynamic and stable regulation of  
588 memory." Biomol Concepts 2(6): 459-467.
- 589 van den Oever, I. A., H. G. Raterman, et al. (2010). "Endothelial dysfunction, inflammation,  
590 and apoptosis in diabetes mellitus." Mediators Inflamm 2010: 792393.
- 591 Yamada, Y., H. Horibe, et al. (2018). "Identification of novel hyper- or hypomethylated CpG  
592 sites and genes associated with atherosclerotic plaque using an epigenome-wide  
593 association study." Int J Mol Med 41(5): 2724-2732.
- 594 Yamada, Y., Y. Yasukochi, et al. (2018). "Identification of 26 novel loci that confer  
595 susceptibility to early-onset coronary artery disease in a Japanese population."  
596 Biomed Rep 9(5): 383-404.
- 597 Zhang, Z., F. Jiang, et al. (2018). "PHACTR1 regulates oxidative stress and inflammation to  
598 coronary artery endothelial cells via interaction with NF-kappaB/p65."  
599 Atherosclerosis 278: 180-189.
- 600 Zhao, Q., S. Liao, et al. (2016). "CDKN2BAS polymorphisms are associated with coronary  
601 heart disease risk a Han Chinese population." Oncotarget 7(50): 82046-82054.
- 602 Zhou, S., Y. Zhang, et al. (2016). "CDKN2B methylation is associated with carotid artery  
603 calcification in ischemic stroke patients." J Transl Med 14(1): 333.
- 604
- 605
- 606

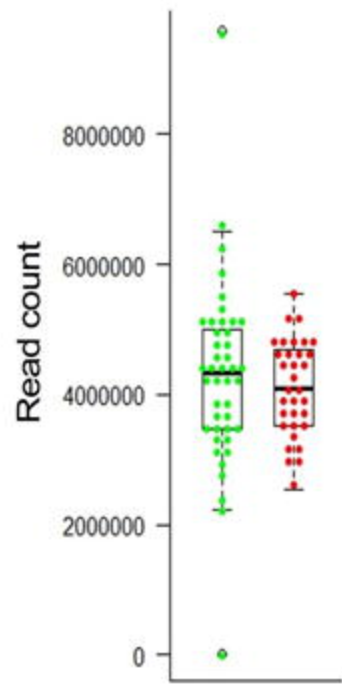

Total No. of reads

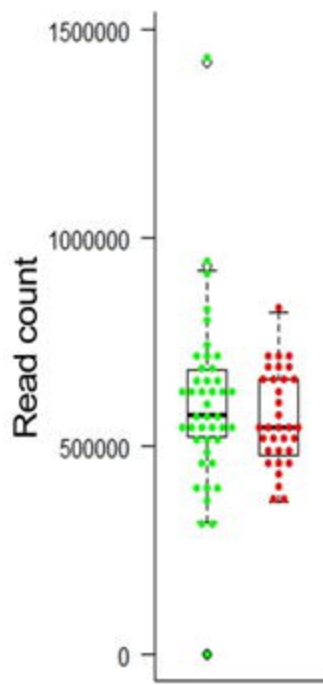

Total No. of QC reads

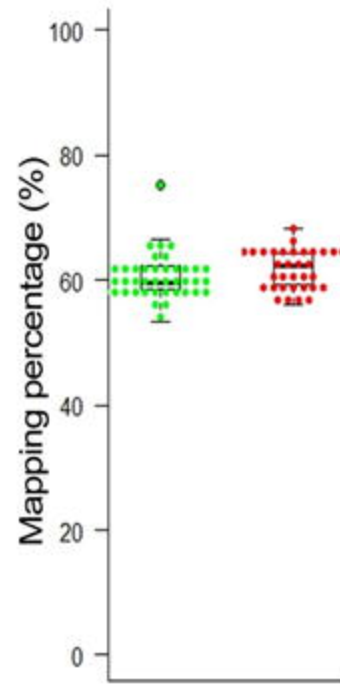

Alignment percentage

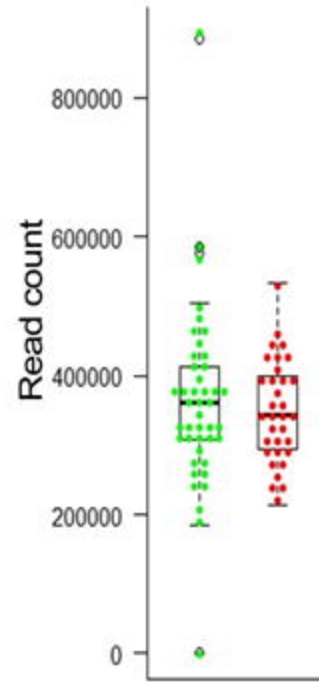

Uniquely mapped reads

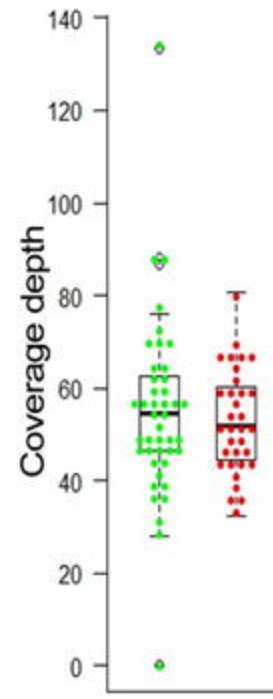

X-coverage

Control  
CAD

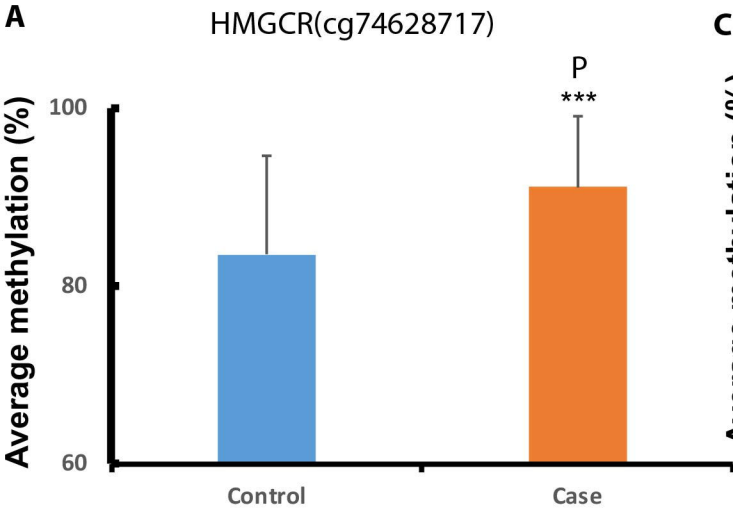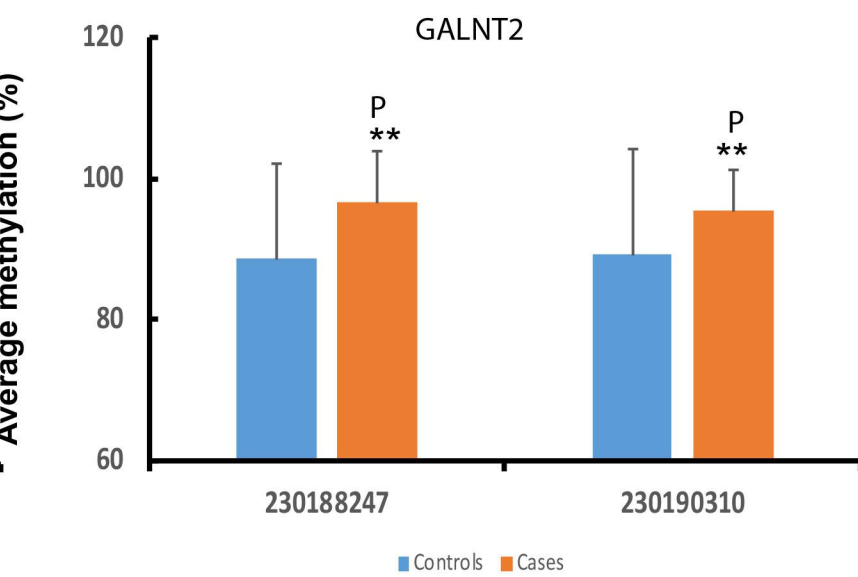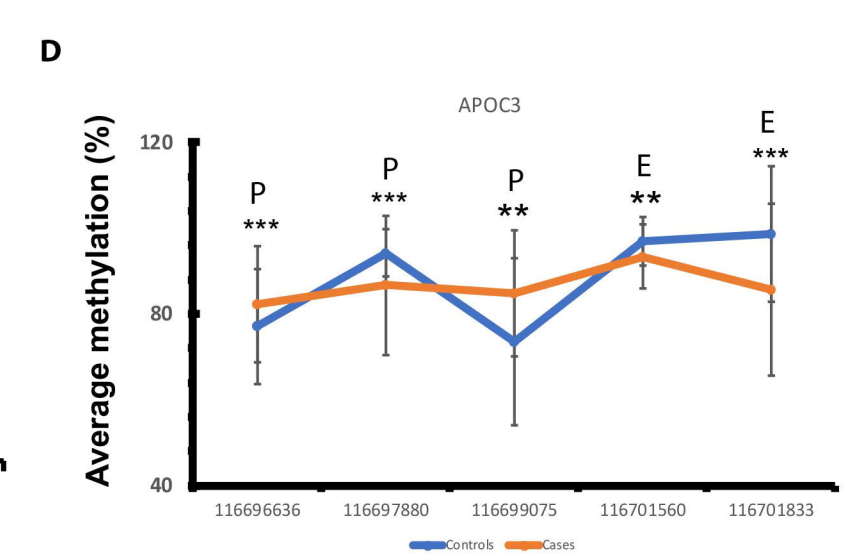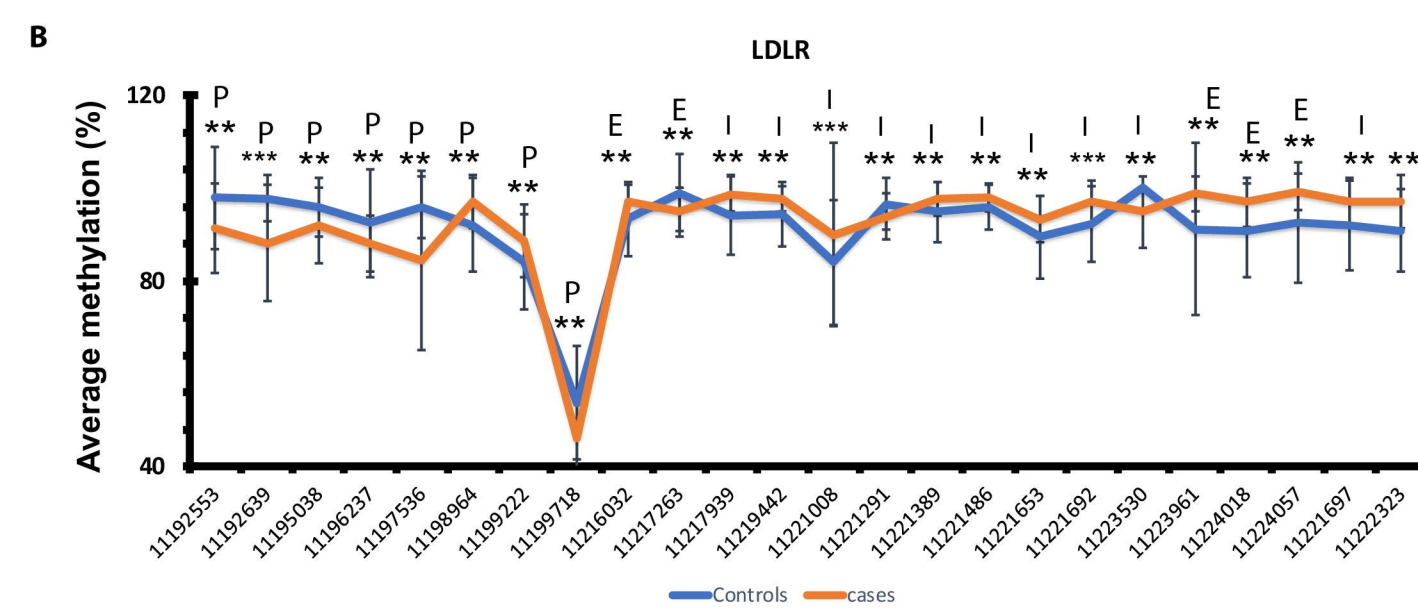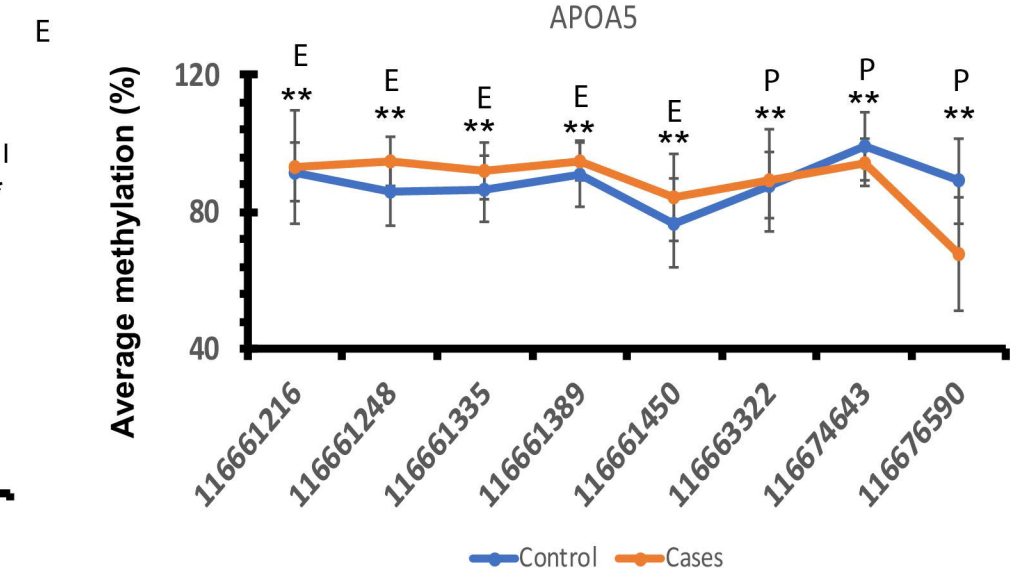

P- Promoter  
E- Exon  
I- Intragenic

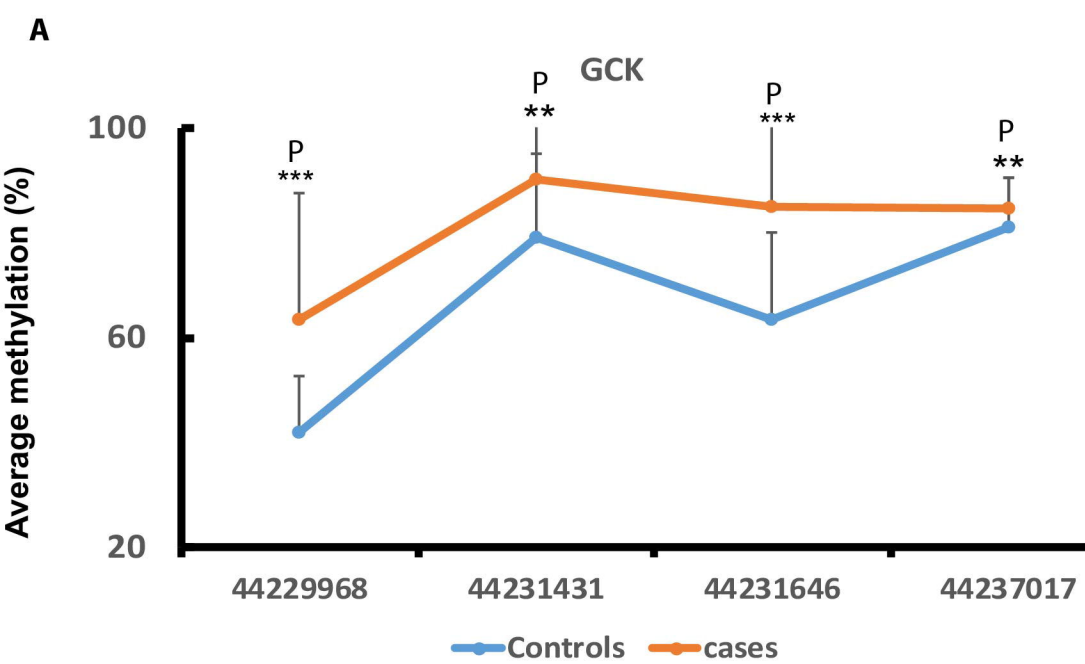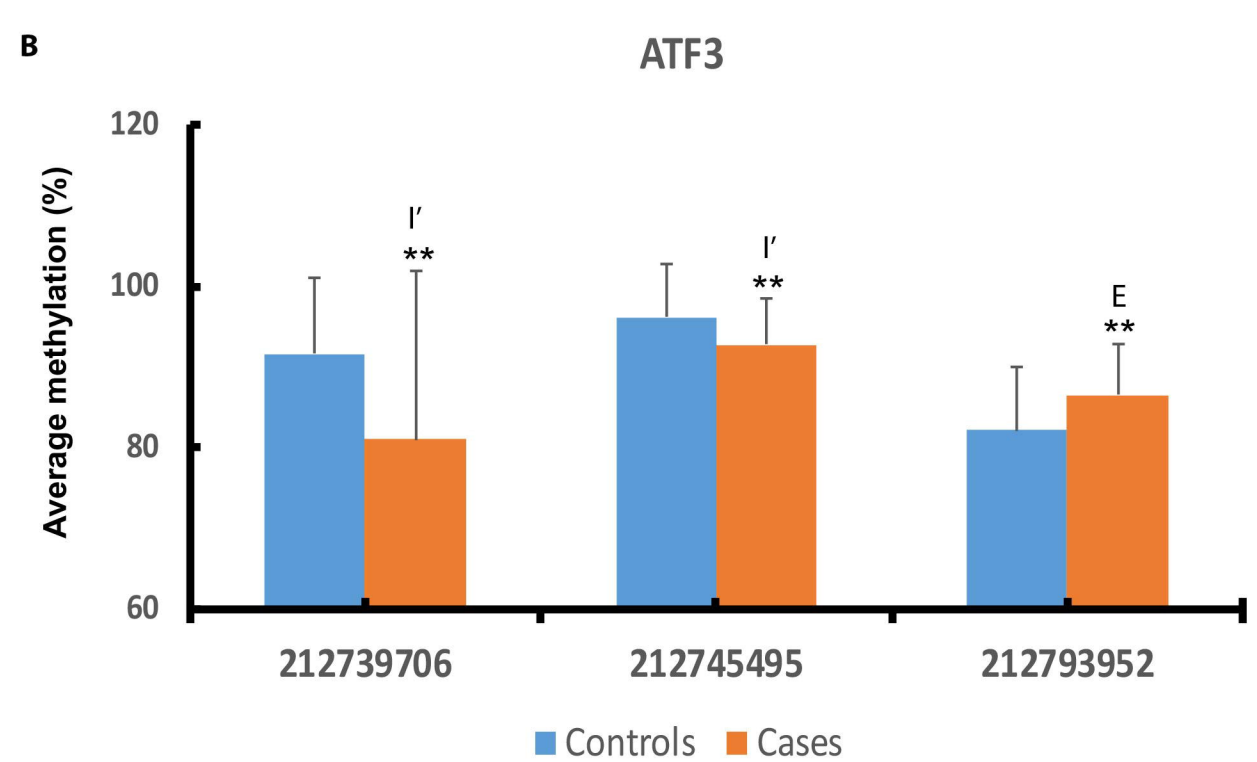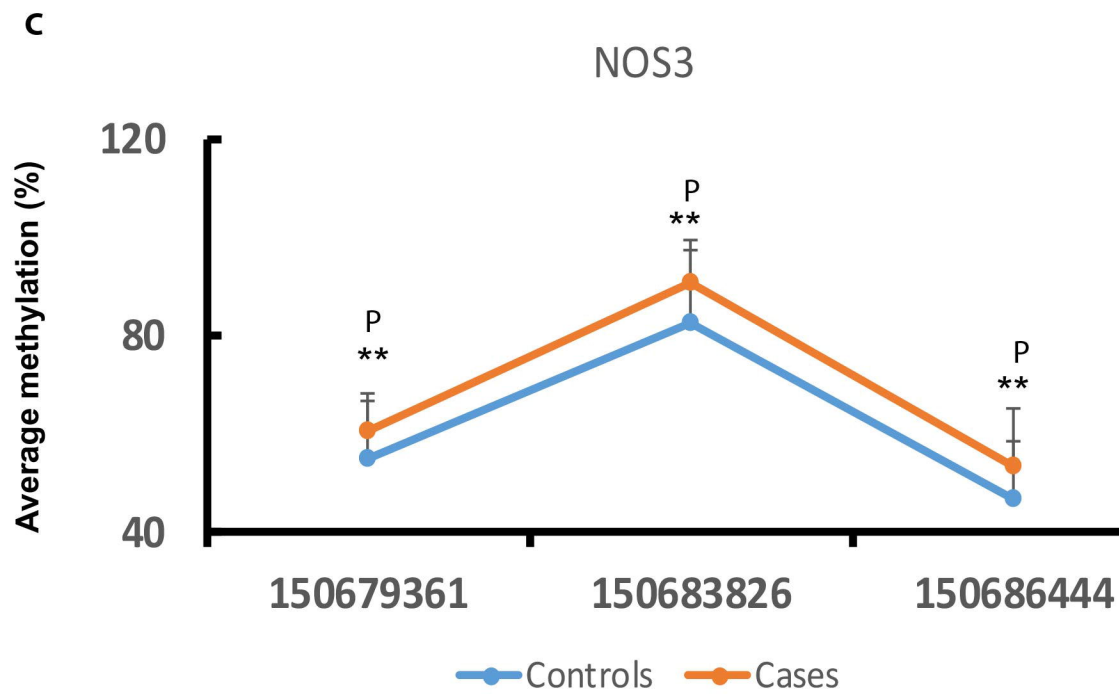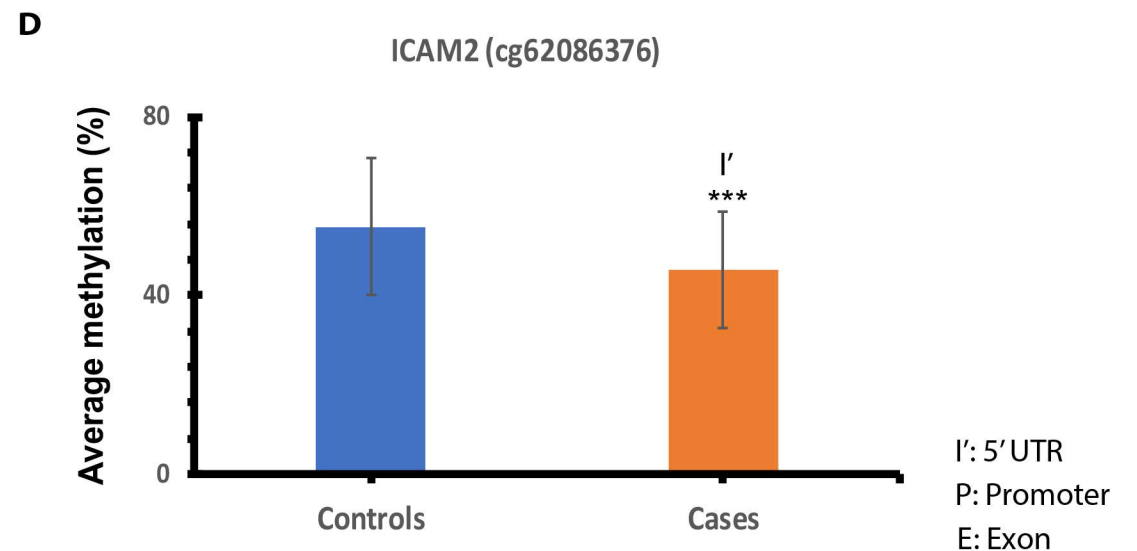



A

BAX(49453159)

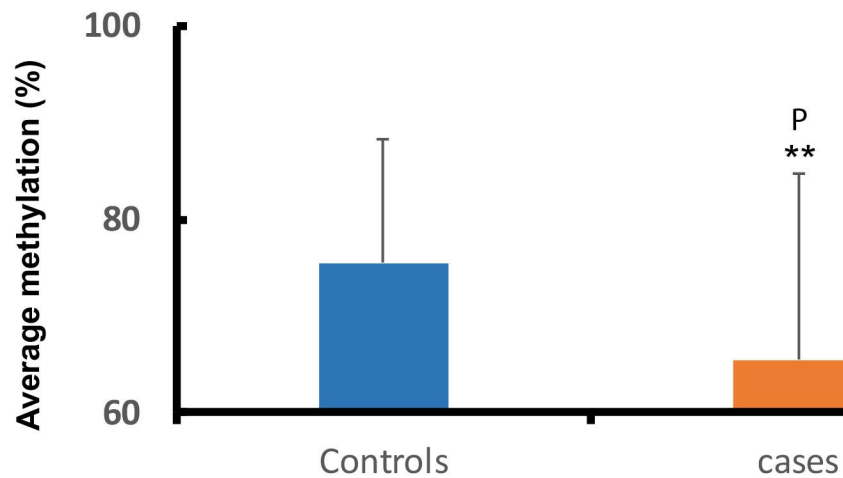

B

BCL2(60995889)

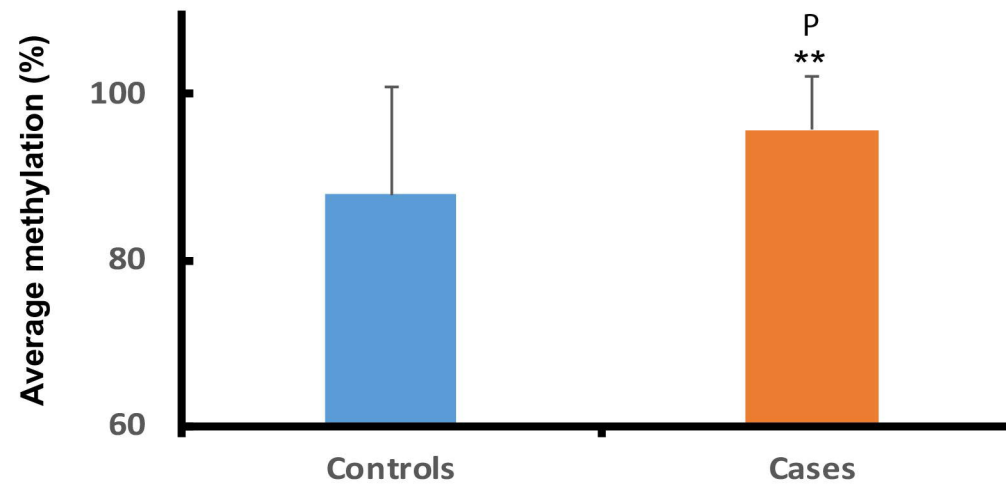

C

LCK

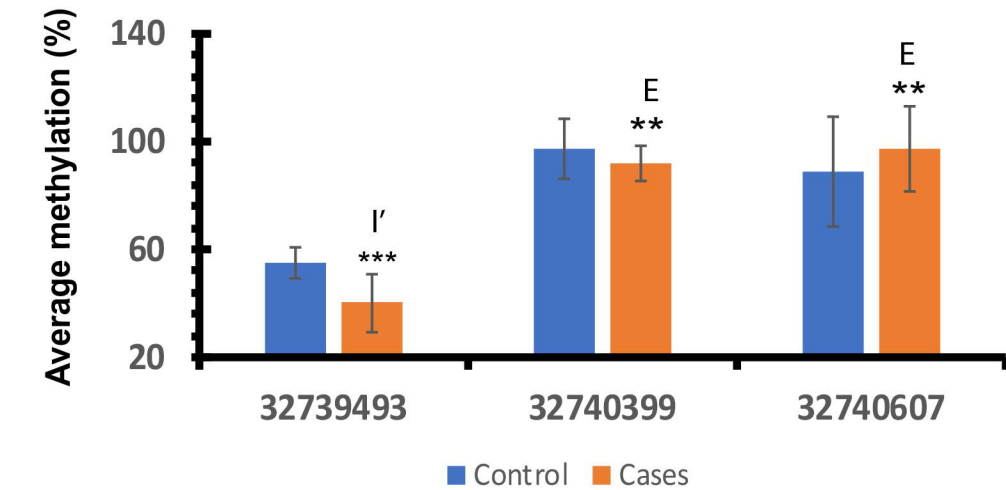

E: Exon  
I': 5' UTR

D

AKT2

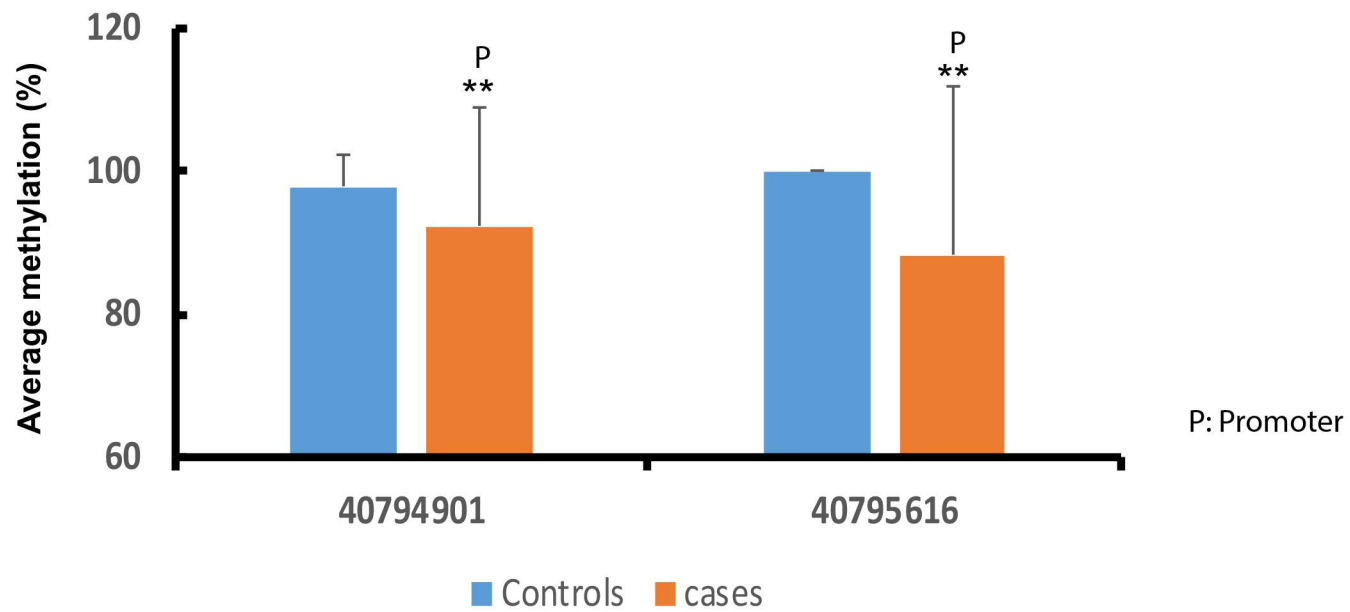



**A**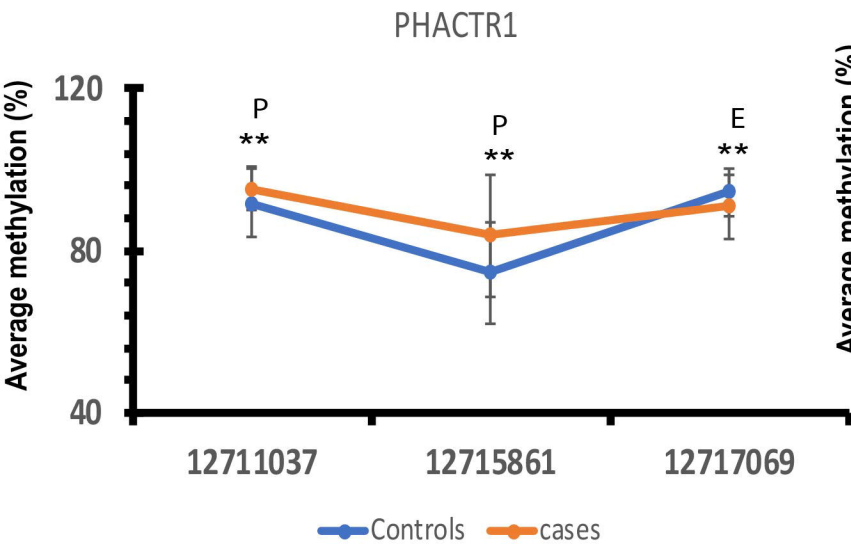**B**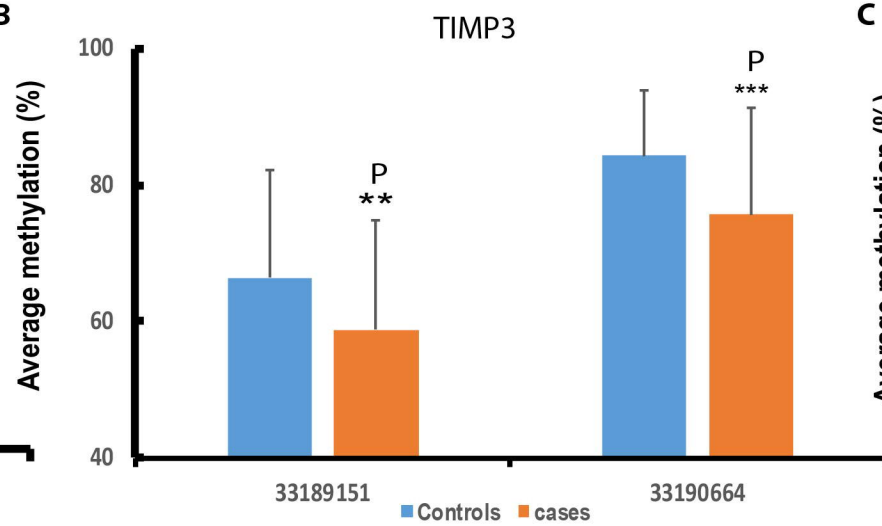**C**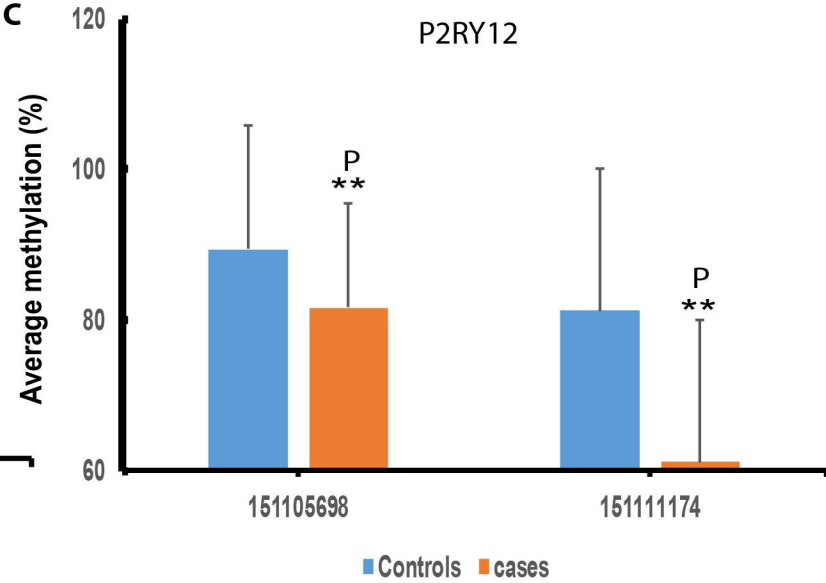**D**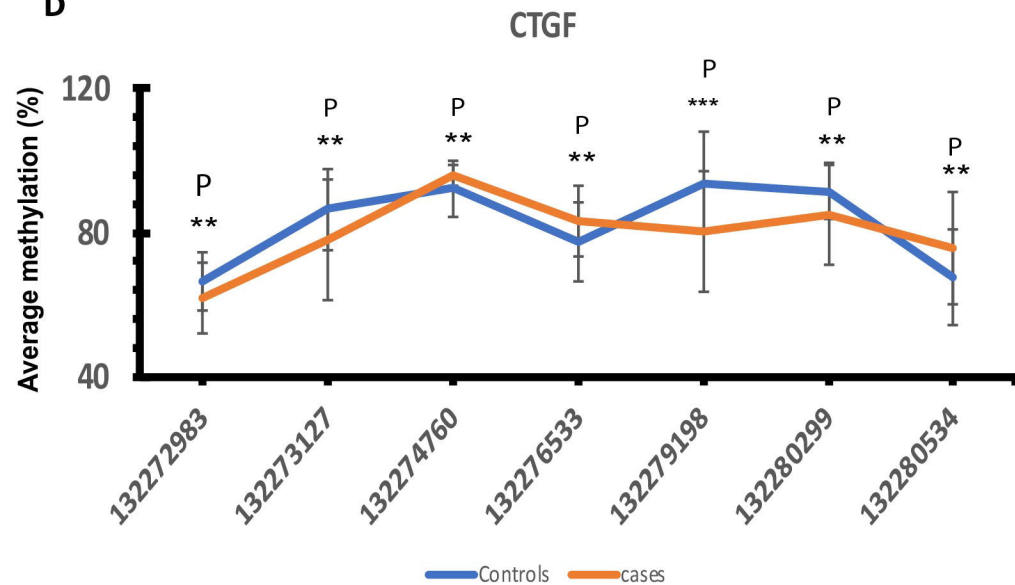**E**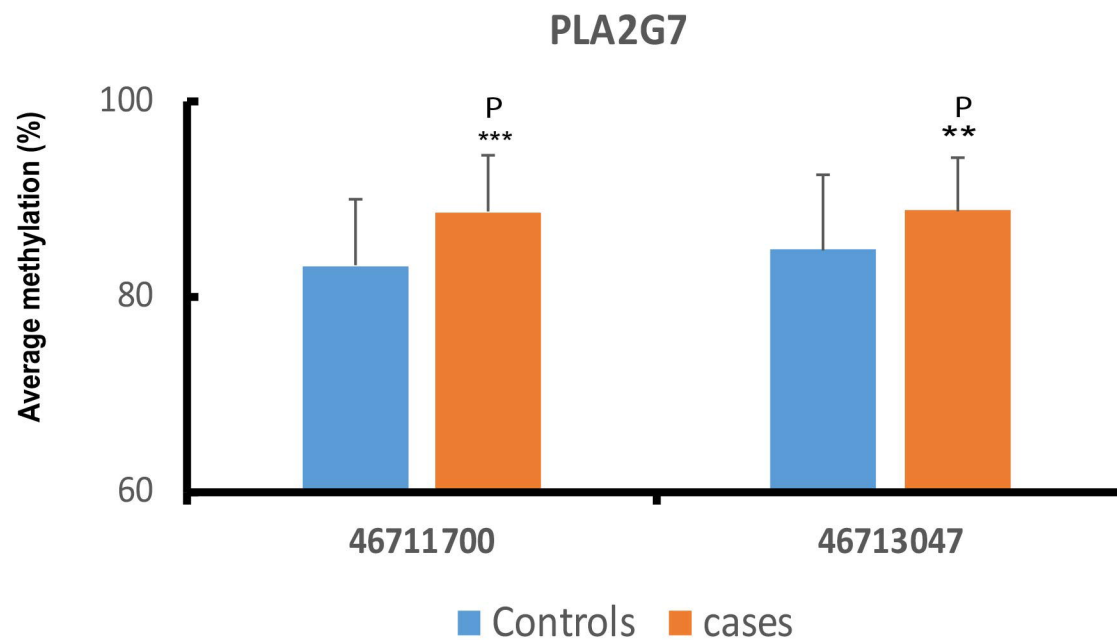

P: Promoter  
E: Exon

# CDKN2BAS1

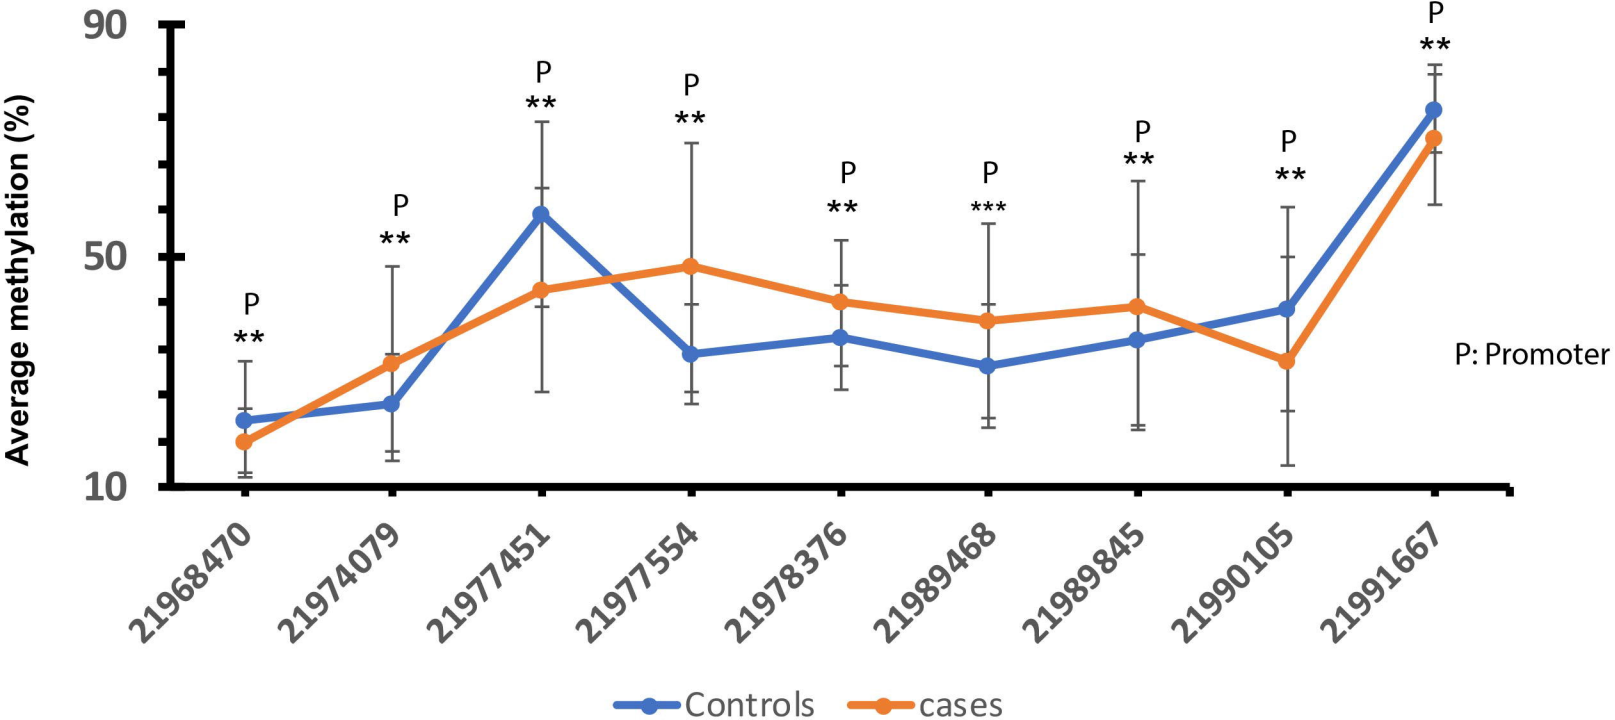

Figure legends:

Figure 1: Sequencing statistics (Total no. of reads, QC reads, alignment percentage, and uniquely mapped reads and X coverage) of all the 76 subjects recruited in the study

Figure 2: Methylation status of CpG present in the *HMGCR* /*GALNT2*/*APOC3*/*LDLR*/*APOA5* gene. Y axis represents average percentage methylation and X axis represents different CpG sites. (P : Promoter; E: Exon; I : Intragenic); \*\* indicates p value < 0.01; \*\*\* indicates p value < 0.001

Figure 3: Methylation status of the genes involved in hyperglycemia and vasoconstriction *GCK*/*ATF3*/*NOS3*/*ICAM2*. P: Promoter, E: Exon; I: 5' UTR.

\*\* indicates p value < 0.01; \*\*\* indicates p value < 0.001

Figure 4: Methylation status of genes involved in apoptosis and inflammation (*BAX*/*BCL2*/*LCK*/*AKT2*).

P: Promoter, E: Exon; I: 5' UTR, \*\* indicates p value < 0.01; \*\*\* indicates p value < 0.001.

Figure 5: Methylation status of the genes involved in inflammation, extracellular matrix remodeling and platelet aggregation (*PHACTR1*/*TIMP3*/*P2RY12*/*CTGF*/*PLA2G7*). P: Promoter, E: Exon. \*\* indicates p value < 0.01; \*\*\* indicates p value < 0.001.

Figure 6: Methylation status of *CDKN2B-AS1* gene; P: Promoter. \*\* indicates p value < 0.01; \*\*\* indicates p value < 0.001.

Supplementary figure 1 shows the study design and working methodology

Supplementary figure 2 describes the detailed workflow of Bioinformatic analysis to identify differentially methylated CpG sites

Supplementary figure 3A shown bioanalyzer profile of end repaired library with an average size of 175 bp. Figure 3B shows bioanalyzer profile of adapter ligated library with an average size of 250-280 bp. Figure 3C shows bioanalyzer profile of indexed library with an average size of 300 bp.
